# Supplementary material
Source: PubMed Central journal article supplement (PMC4793860)
Supplement: mara020356.ww1_default.pdf [file mara020356.ww1_default.pdf]

**Appendix 1a. Intervention: first email to be sent to the sponsor and/or the principal investigator of studies**

Dear colleague,

We are carrying out a survey on the posting of results onto ClinicalTrials.gov.

As mentioned on ClinicalTrials.gov, you have registered a clinical trial, NCT ....., entitled ..... According to the Food and Drug Administration Amendments Act, the summary results of your study should currently be posted onto the registry, since its (primary) completion date (.....) is now over a year old.

We would be grateful if you could kindly inform us on the reason(s) for not posting your results, by answering the following questions (please delete the inappropriate answer yes/no):

- **lack of time: Yes/No**
- **I was unaware of the legal requirement to post results: Yes/No**
- **I forgot to postpone the study primary completion date: Yes/No**
- **My study is not related to the FDAAA: Yes/No**
- **I was unaware that the results publication in a journal does not exempt me from posting summary results onto the registry: Yes/No**
- **I was not informed that the FDA Law might impose a significant fine for failing to post results (up to \$10,000 a day): Yes/No**
- **I was not informed that the FDA law may withhold or recover grant fund (for federally-funded trials): Yes/No**
- **Other reasons (please provide details): Yes/No**

---

---

- **Will you post the results after receiving this email? Yes/No**
- **Do you think that receiving a reminding email from ClinicalTrials.gov system encourages the posting of results? Yes/no**

Please delete the inappropriate answers (yes or no) and email us your answers. Alternatively, you can also reply through the following link.....

Thank you for taking the time to answer this survey.

Best regards,

Philippe Ravaud, MD, PhD

Department of Epidemiology – Mailman School of Public Health

Columbia University

**Appendix 1b. Follow-up email to be sent systematically 7 days after the first one**

Dear colleague,

Seven days ago, you received an email informing you that we were carrying out a survey on the posting of results onto ClinicalTrials.gov. If you already answered our previous email, please ignore this one.

We are carrying out a survey on the posting of results onto ClinicalTrials.gov.

As mentioned on ClinicalTrials.gov, you have registered a clinical trial, NCT ....., entitled ..... According to the Food and Drug Administration Amendments Act, the summary results of your study should currently be posted onto the registry, since its (primary) completion date (.....) is now over a year old.

We would be grateful if you could kindly inform us on the reason(s) for not posting your results, by answering the following questions (please delete the inappropriate answer yes/no):

- **lack of time: Yes/No**
- **I was unaware of the legal requirement to post results: Yes/No**
- **I forgot to postpone the study primary completion date: Yes/No**
- **My study is not related to the FDAAA: Yes/No**
- **I was unaware that the results publication in a journal does not exempt me from posting summary results onto the registry: Yes/No**
- **I was not informed that the FDA Law might impose a significant fine for failing to post results (up to \$10,000 a day): Yes/No**
- **I was not informed that the FDA law may withhold or recover grant fund (for federally-funded trials): Yes/No**
- **Other reasons (please provide details): Yes/No**

---

---

- **Will you post the results after receiving this email? Yes/No**
- **Do you think that receiving a reminding email from ClinicalTrials.gov system encourages the posting of results? Yes/no**

Please delete the inappropriate answers (yes or no) and email us your answers. Alternatively, you can also reply through the following link.....

Thank you for taking the time to answer this survey.

Best regards,

Philippe Ravaud, MD, PhD

Department of Epidemiology – Mailman School of Public Health

Columbia University

**Appendix 1c. Follow-up email to be sent systematically 2 months after the first one**

Dear colleague,

Two months ago, you received an email informing you that we were carrying out a survey on the posting of results onto ClinicalTrials.gov. If you already answered our previous email, please ignore this one.

We are carrying out a survey on the posting of results onto ClinicalTrials.gov.

As mentioned on ClinicalTrials.gov, you have registered a clinical trial, NCT ....., entitled ..... According to the Food and Drug Administration Amendments Act, the summary results of your study should currently be posted onto the registry, since its (primary) completion date (.....) is now over a year old.

We would be grateful if you could kindly inform us on the reason(s) for not posting your results, by answering the following questions (please delete the inappropriate answer yes/no):

- **lack of time: Yes/No**
- **I was unaware of the legal requirement to post results: Yes/No**
- **I forgot to postpone the study primary completion date: Yes/No**
- **My study is not related to the FDAAA: Yes/No**
- **I was unaware that the results publication in a journal does not exempt me from posting summary results onto the registry: Yes/No**
- **I was not informed that the FDA Law might impose a significant fine for failing to post results (up to \$10,000 a day): Yes/No**
- **I was not informed that the FDA law may withhold or recover grant fund (for federally-funded trials): Yes/No**
- **Other reasons (please provide details): Yes/No**

---

---

- **Will you post the results after receiving this email? Yes/No**
- **Do you think that receiving a reminding email from ClinicalTrials.gov system encourages the posting of results? Yes/no**

Please delete the inappropriate answers (yes or no) and email us your answers. Alternatively, you can also reply through the following link.....

Thank you for taking the time to answer this survey.

Best regards,

Philippe Ravaud, MD, PhD

Cochrane Collaboration & Department of Epidemiology

Department of Epidemiology – Mailman School of Public Health



**Appendix 1d. Follow-up email to be sent systematically 5 months after the first one**

Dear colleague,

Four months ago, you received an email informing you that we were carrying out a survey on the posting of results onto ClinicalTrials.gov. We are especially interested in the understanding of barriers to the posting of results, and would be very grateful if you could help us, by answering this short survey.

Please note that we have no connection to ClinicalTrials.gov; our complete affiliation is written below. Our study has been approved by IRB of Ile de France (#20120601).

If you already answered our previous email, please ignore this one.

As mentioned on ClinicalTrials.gov, you have registered a clinical trial, NCT ....., entitled ..... According to the Food and Drug Administration Amendments Act, the summary results of your study should currently be posted onto the registry, since its (primary) completion date (.....) is now over a year old.

Would you mind informing us on the reason(s) for not posting your results, by answering the following questions (please delete the inappropriate answer yes/no):

- **lack of time: Yes/No**
- **I was unaware of the legal requirement to post results: Yes/No**
- **I forgot to postpone the study primary completion date: Yes/No**
- **My study is not related to the FDAAA: Yes/No**
- **I was unaware that the results publication in a journal does not exempt me from posting summary results onto the registry: Yes/No**
- **I was not informed that the FDA Law might impose a significant fine for failing to post results (up to \$10,000 a day): Yes/No**
- **I was not informed that the FDA law may withhold or recover grant fund (for federally-funded trials): Yes/No**
- **Other reasons (please provide details): Yes/No**

---

---

- **Will you post the results after receiving this email? Yes/No**
- **Do you think that receiving a reminding email from ClinicalTrials.gov system encourages the posting of results? Yes/no**

Please delete the inappropriate answers (yes or no) and email us your answers.

Thank you for taking the time to answer this survey.

Best regards,

Philippe Ravaud, MD, PhD

Cochrane Collaboration & Department of Epidemiology

Mailman School of Public Health

Columbia University
