# Supplementary material
Source: PubMed Central journal article supplement (PMC4793860)
Supplement: mara020356.ww2_default.pdf [file mara020356.ww2_default.pdf]

## Descriptive analysis of the answers on the survey

| Characteristics                                                                   | Population n=49<br>(%) |
|-----------------------------------------------------------------------------------|------------------------|
| Lack of time                                                                      |                        |
| Yes                                                                               | 13 (26.5)              |
| No                                                                                | 14 (28.6)              |
| No answer                                                                         | 22 (44.9)              |
| Unaware of the legal requirement                                                  |                        |
| Yes                                                                               | 20 (40.8)              |
| No                                                                                | 5 (10.2)               |
| No answer                                                                         | 24 (49.0)              |
| Forgot to postpone the study primary completion date                              |                        |
| Yes                                                                               | 8 (16.3)               |
| No                                                                                | 18 (36.8)              |
| No answer                                                                         | 23 (46.9)              |
| Study not related to the FDAAA                                                    |                        |
| Yes                                                                               | 9 (18.4)               |
| No                                                                                | 13 (26.5)              |
| No answer                                                                         | 27 (55.1)              |
| Unaware that the results publication in a journal does not exempt posting results |                        |
| Yes                                                                               | 17 (34.7)              |
| No                                                                                | 7 (14.3)               |
| No answer                                                                         | 25 (51.0)              |
| Not informed that the FDA Law might impose a significant fine                     |                        |
| Yes                                                                               | 24 (49.0)              |
| No                                                                                | 3 (6.1)                |
| No answer                                                                         | 22 (44.9)              |
| Not informed that the FDA law may withhold or recover grant fund                  |                        |
| Yes                                                                               | 20 (40.8)              |
| No                                                                                | 6 (12.3)               |
| No answer                                                                         | 23 (46.9)              |
| Other reasons                                                                     |                        |
| Yes                                                                               | 17 (34.7)              |
| No                                                                                | 2 (4.1)                |
| No answer                                                                         | 30 (61.2)              |
| Will you post the results                                                         |                        |
| Yes                                                                               | 17 (34.7)              |
| No                                                                                | 5 (10.2)               |
| No answer                                                                         | 27 (55.1)              |
| E-mail encourages the posting of results?                                         |                        |
| Yes                                                                               | 20 (40.8)              |
| No                                                                                | 3 (6.1)                |
| No answer                                                                         | 26 (53.1)              |
