# Supplementary material
Source: PubMed Central journal article supplement (PMC4793860)

### Forest plot for 3-month data

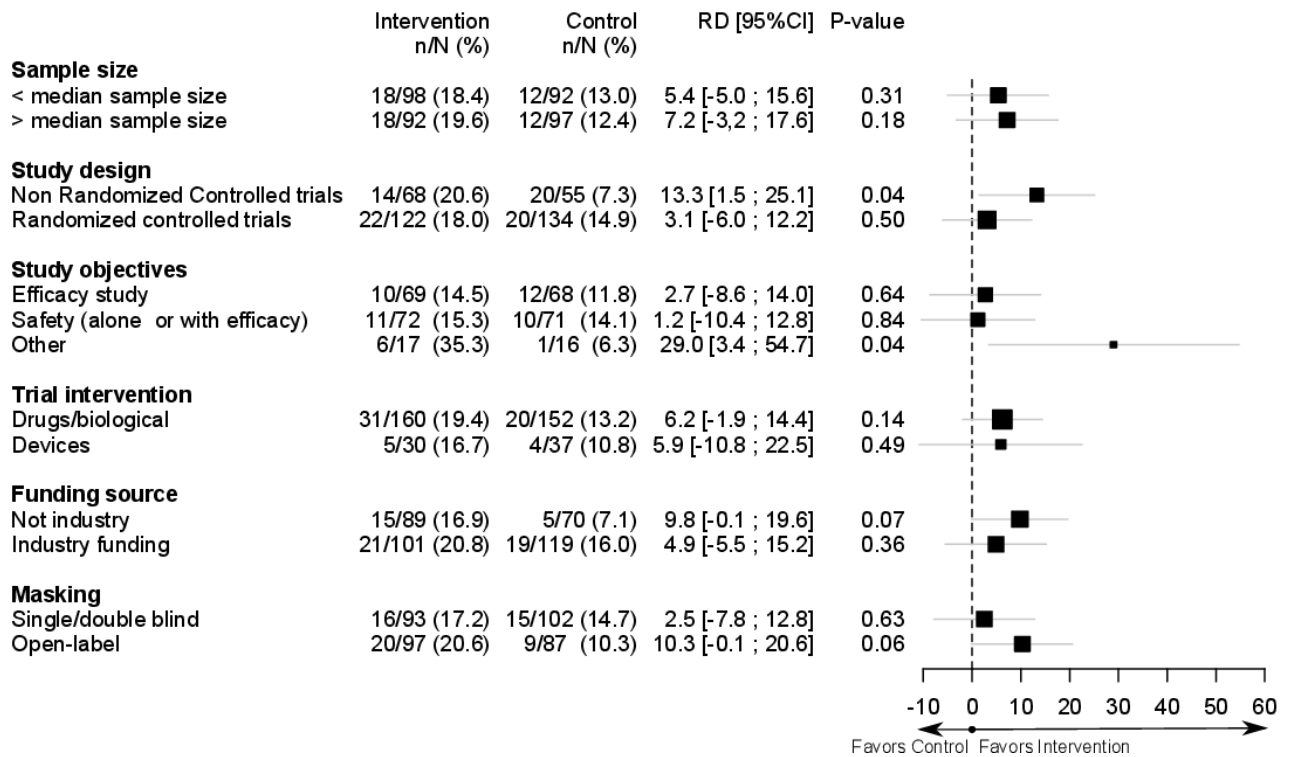

### Forest plot for 6-month data

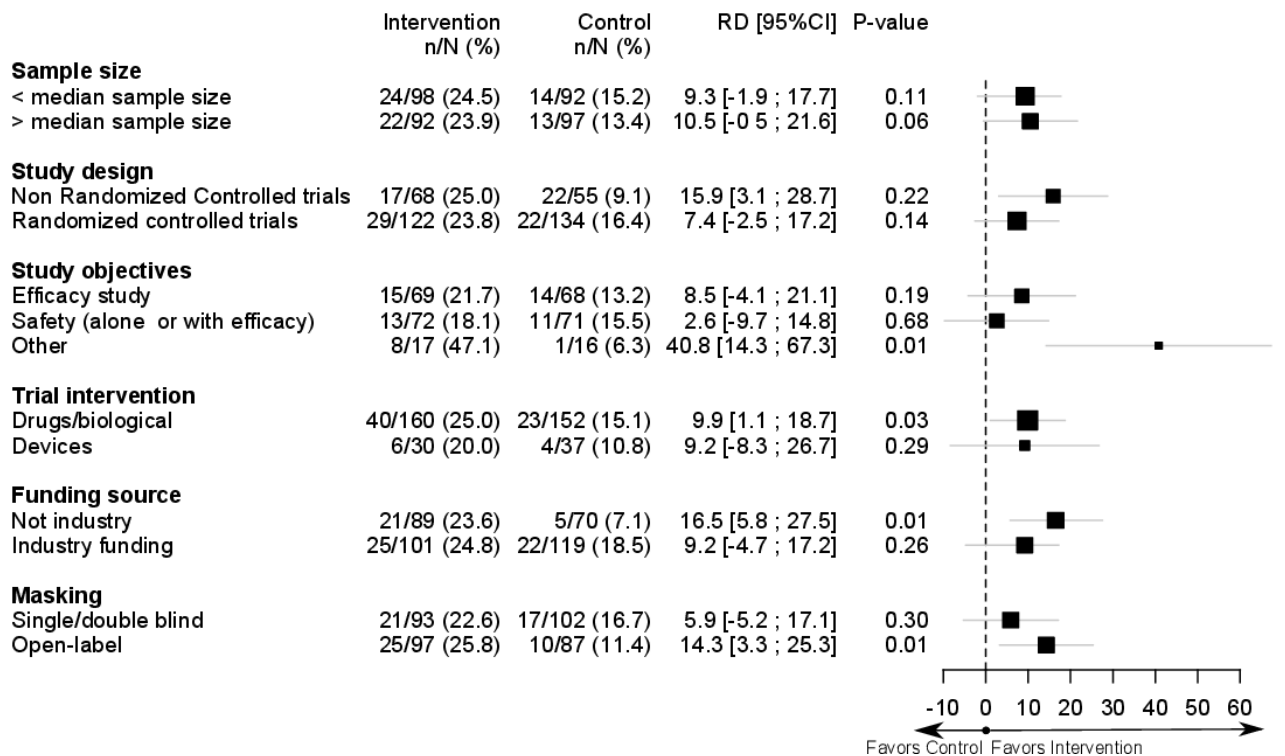

Supplement: mara020356.ww3_default.pdf [file mara020356.ww3_default.pdf]
